# Supplementary material for: A highly hydrophilic benzenesulfonic-grafted graphene oxide-based hybrid membrane for ethanol dehydration
Source: Royal Society of Chemistry journal article supplement (doi:10.1039/d0ra02668a), 2020-01-01
Supplement: d0ra02668a1.pdf [file d0ra02668a1.pdf]

## Supporting Information for

### Highly Hydrophilic Benzenesulfonic Grafted Graphene Oxide Based Hybrid Membrane for Ethanol Dehydration

Lin Tang<sup>a</sup>, Yingying Lu<sup>a</sup>, Lulu Yao<sup>a,\*</sup>, Peng Cui<sup>a,\*</sup>

*<sup>a</sup> School of Chemistry and Chemical Engineering, Hefei University of Technology; Anhui Province Key Laboratory of Controllable Chemical Reaction & Materials Chemical Engineering, 230009, Tunxi Road 193, Hefei, China*

\* Corresponding Author:

E-mail: [yaolulu166@hfut.edu.cn](mailto:yaolulu166@hfut.edu.cn)

[cuipeng@hfut.edu.cn](mailto:cuipeng@hfut.edu.cn)

Number of pages: 8

Number of figures: 9

Number of tables: 2

**Note:** The figures, tables and text in this Supporting Information document are presented in the order in which they are referenced in the main paper.

## Supporting Figures

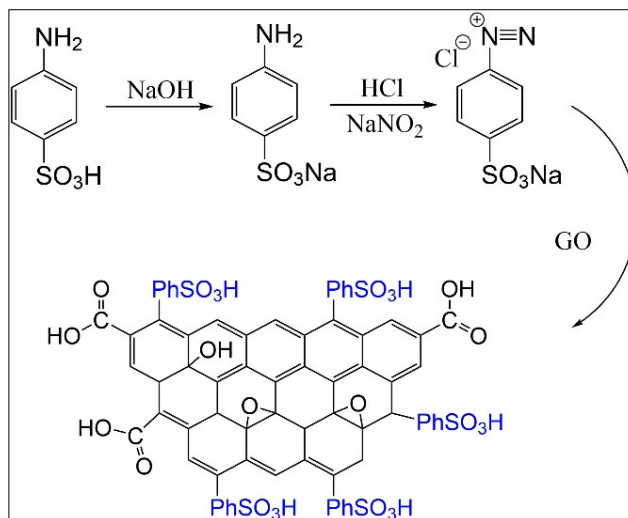

Figure S 1 Reaction scheme for Synthesis of BS@GO.

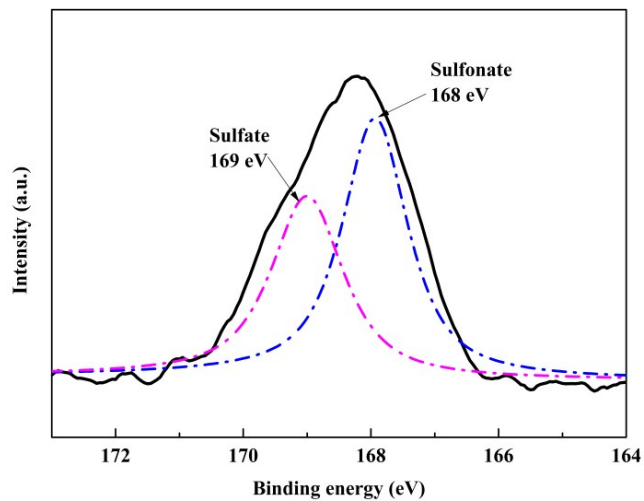

Figure S2 XPS S 2p Scan of BS@GO

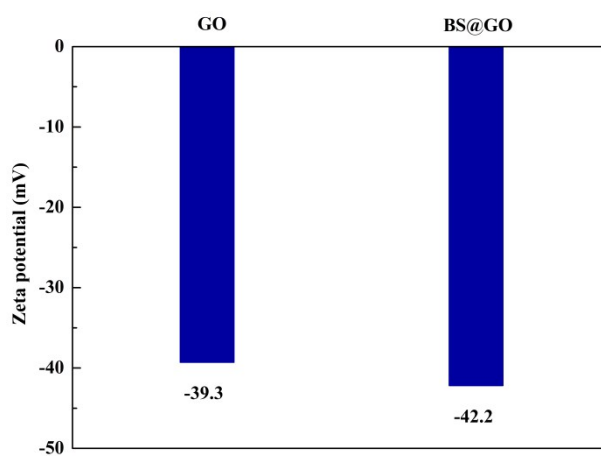

Figure S3 Zeta potentials of GO and BS@GO

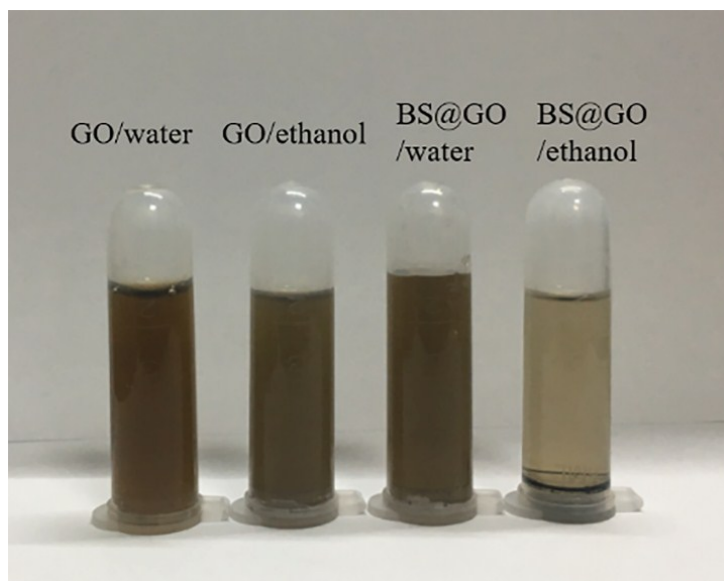

Figure S4 Photographs of GO and BS@GO dispersions with water or ethanol as solvent.

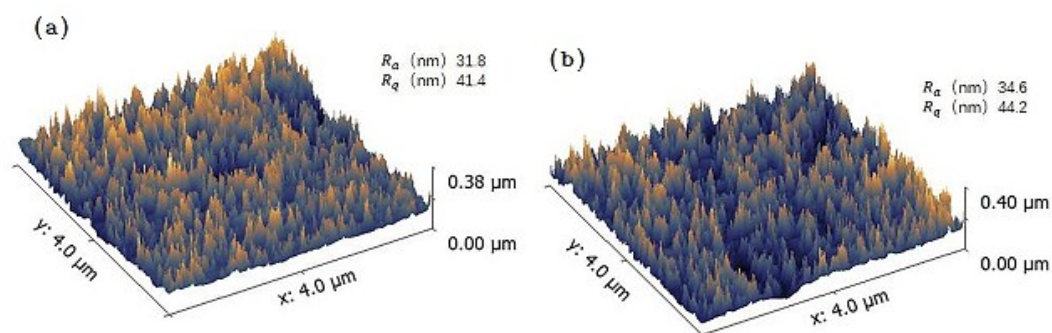

Figure S5 AFM images and roughness data of (a) SA, (b) SA-BS@GO-1.5.

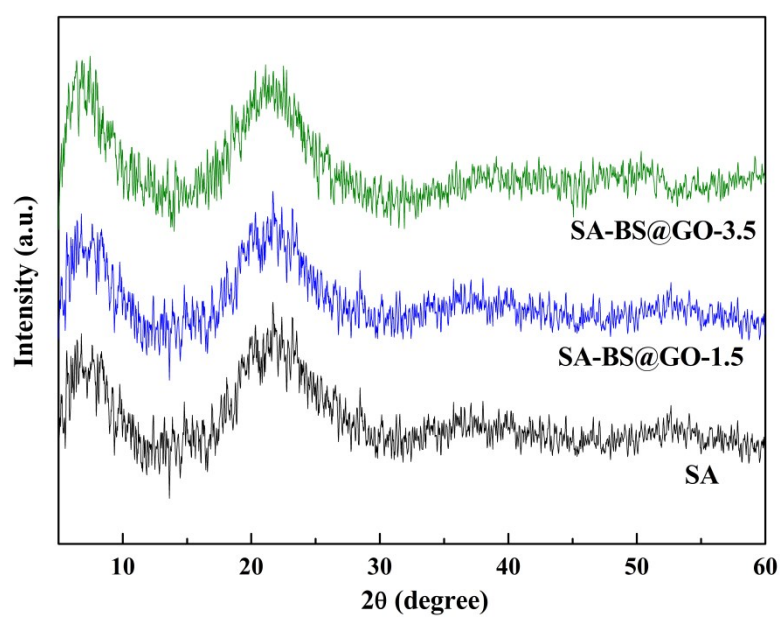

Figure S6 X-ray diffraction curves of SA and SA-BS@GO(X) hybrid membranes.

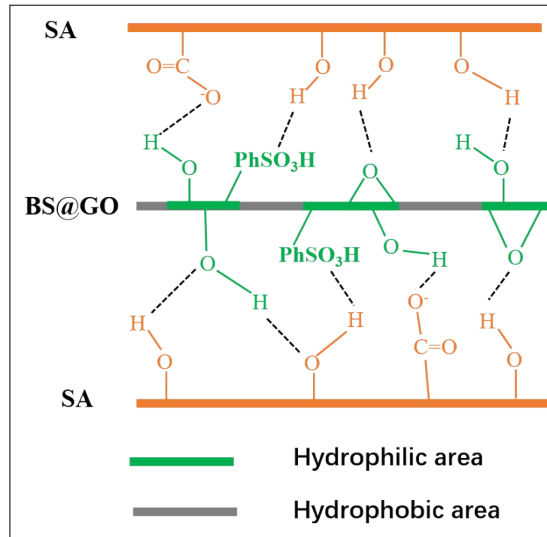

Figure S 7 H-bonds between BS@GO and SA matrix.

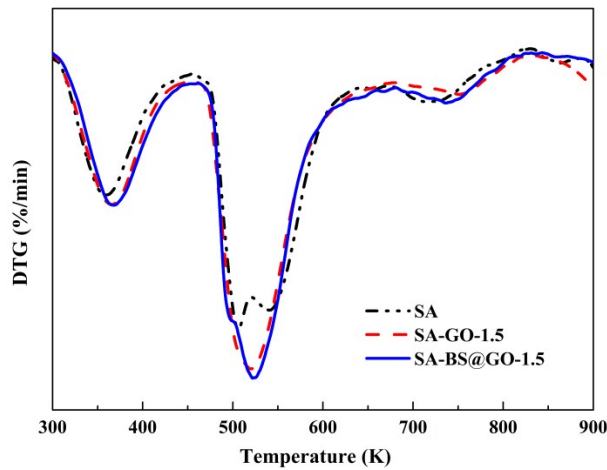

Figure S8 DTG curves of different membrane samples.

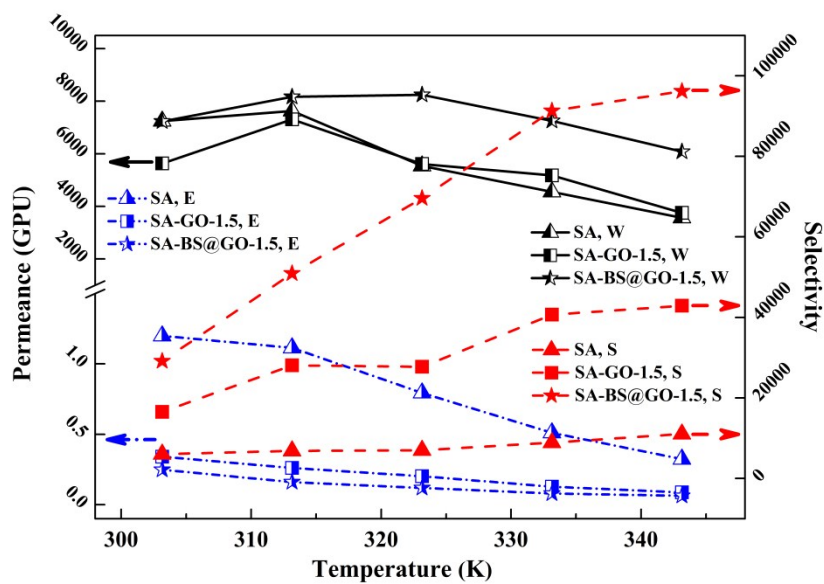

Figure S9 Effects of feed temperature on water permeability, ethanol permeability and selectivity of SA, SA-GO-1.5 and SA-BS@GO-1.5 membranes.

## Supporting Tables

Table S1 Thermogravimetric parameters of different membrane samples.

| Membrane<br>Sample | 1st stage             |                     |        | 2nd stage             |                     |        | 3rd stage             |                     |        |
|--------------------|-----------------------|---------------------|--------|-----------------------|---------------------|--------|-----------------------|---------------------|--------|
|                    | t <sub>onset</sub> /K | t <sub>end</sub> /K | % char | t <sub>onset</sub> /K | t <sub>end</sub> /K | % char | t <sub>onset</sub> /K | t <sub>end</sub> /K | % char |
| SA                 | 305.2                 | 458.4               | 11.7   | 458.4                 | 670.2               | 35     | 670.2                 | 833.3               | 7.2    |
| SA-GO-1.5          | 304.1                 | 458.4               | 12.6   | 458.4                 | 682.4               | 37.4   | 682.4                 | 837.8               | 6.1    |
| SA-BS@GO-1.5       | 304.1                 | 457.2               | 12.7   | 457.2                 | 679.1               | 38.7   | 679.1                 | 843.3               | 6.2    |

Table S2 A list of ethanol dehydration performance by recently reported membrane.

| Type                         | Membranes                                  | F <sub>w</sub><br>(wt%) | Temperature<br>(°C) | Pervaporation performance                 |          | Ref. |
|------------------------------|--------------------------------------------|-------------------------|---------------------|-------------------------------------------|----------|------|
|                              |                                            |                         |                     | Flux (g m <sup>-2</sup> h <sup>-1</sup> ) | $\alpha$ |      |
| SA matrix<br>membranes       | SA/ZIF-L                                   | 10                      | 77                  | 1218                                      | 1840     | 1    |
|                              | SA/PSBMA@GO                                | 10                      | 76                  | 2140                                      | 1370     | 2    |
|                              | SA-HPA                                     | 10                      | 30                  | 140                                       | 14991    | 3    |
|                              | SA-HPA                                     | 10                      | 60                  | 315                                       | 1000     | 3    |
|                              | SA-PTA                                     | 10                      | 30                  | 111                                       | 1866     | 4    |
|                              | SA-PTA                                     | 10                      | 60                  | 567                                       | 220      | 4    |
|                              | SA-PVP-PWA                                 | 10                      | 27                  | 100                                       | 1250     | 5    |
|                              | HA/SA/PAN                                  | 10                      | 80                  | 972                                       | 1130     | 6    |
|                              | SA-PAA@Fe <sub>3</sub> O <sub>4</sub> /PAN | 10                      | 77                  | 1634                                      | 1044     | 7    |
| SA-4A                        | 2.5                                        | 25                      | 106                 | 396                                       | 8        |      |
| GO-based<br>membranes        | GO/GTA                                     | 15                      | 60                  | 1020                                      | 107      | 1    |
|                              | GO/Al <sub>2</sub> O <sub>3</sub>          | 10                      | 70                  | 1300                                      | 250      | 9    |
|                              | GO/PC                                      | 25                      | 24                  | 1300                                      | 211      | 10   |
|                              | CS/FGO                                     | 10                      | 30                  | 250                                       | 1093     | 11   |
|                              | 1%IL-GO-PEBA                               | 2.5                     | 60                  | 1828.3                                    | 32.5     | 12   |
|                              | PVA/GO                                     | 10                      | 45                  | 145                                       | 3095     | 13   |
|                              | SA-rGO/PAN                                 | 10                      | 77                  | 1699                                      | 566      | 14   |
| PVA-GOF                      | 10                                         | 70                      | 300                 | 330                                       | 15       |      |
| Other<br>matrix<br>membranes | PVA (Phenyltriethoxysilane)                | 15                      | 40                  | 145                                       | 1026     | 16   |
|                              | PVA (Diethoxydiphenylsilane)               | 15                      | 40                  | 141                                       | 248      | 17   |
|                              | PVA (Mesoporous silica)                    | 10                      | 60                  | 855                                       | 42       | 17   |
|                              | PVA/GA/((PEI-GO)/PAA) <sub>4</sub>         | 5                       | 50                  | 156                                       | 981      | 18   |
|                              | PVA/modified CNT                           | 10                      | 30                  | 395                                       | 662      | 19   |
|                              | PVA/TiO-CNT                                | 10                      | 30                  | 388                                       | 805      | 21   |
| PVA/CNT                      | 10                                         | 40                      | 82                  | 460                                       | 20       |      |

|           |                                    |    |    |      |       |           |
|-----------|------------------------------------|----|----|------|-------|-----------|
|           | PVA/CNT                            | 10 | 40 | 50   | 780   | 21        |
|           | PVA                                | 10 | 60 | 120  | 115   | 22        |
|           | PVA (GFT 1510/2510)                | 5  | 60 | 600  | 258   | 23        |
|           | PVA/ZIF-90                         | 10 | 30 | 268  | 1379  | 24        |
|           | PVA/Fe-DA                          | 10 | 30 | 995  | 2980  | 25        |
|           | PVA/N,N-methylene<br>bisacrylamide | 5  | 40 | 353  | 3781  | 26        |
|           | CS-ZIF7                            | 10 | 25 | 314b | 2885b | 27        |
| This work | SA-BS@GO-1.5                       | 10 | 50 | 461  | 4969  | Long-term |
|           | SA-BS@GO-1.5                       | 10 | 70 | 703  | 5480  | optimum   |

## References

- 1 D. Hua, R. K. Rai, Y. Zhang and T. S. Chung, *Chem. Eng. Sci.*, 2017, **161**, 341-349.
- 2 J. Zhao, Y. W. Zhu, G. W. He, R. S. Xing, F. S. Pan, Z. Y. Jiang, P. Zhang, X. Z. Cao and B. Y. Wang, *ACS Appl. Mater. Interfaces.*, 2016, **8**, 2097-2103.
- 3 V. T. Magalad, A. R. Supale, S. P. Maradur, G. S. Gokavi and T. M. Aminabhavi, *Chem. Eng. J.*, 2010, **159**, 75-83.
- 4 S. G. Adoor, V. Rajineekanth, M. N. Nadagouda, K. C. Rao, D.D. Dionysiou and T. M. Aminabhavi, *Sep. Purif. Technol.*, 2013, **113**, 64-74.
- 5 V. T. Magalad, G. S. Gokavi, C. Ranganathaiah, M. H. Burshe, C. Han, D. D. Dionysiou, M. N. Nadagouda and T. M. Aminabhavi, *J. Membr. Sci.*, 2013, **430**, 321-329.
- 6 C.Y. Gao, M. H. Zhang, J. W. Ding, F. S. Pan, Z. Y. Jiang, Y. F. Li and J. Zhao, *Carbohydr. Polym.*, 2014, **99**, 158-165.
- 7 C. H. Zhao, Z. Y. Jiang, J. Zhao, K. T. Cao, Q. Zhang and F. S. Pan, *Ind. Eng. Chem. Res.*, 2014, **53**, 1606-1616.
- 8 F. U. Nigiz, H. Dogan and N. D. Hilmioglu, *Desalination.*, 2012, **300**, 24-31.
- 9 G. Li, L. Shi, G. Zeng, Y. Zhang and Y. H. Sun, *RSC Adv.*, 2014, **4**, 52012-52015.
- 10 Y. P. Tang, D. R. Paul and T.S. Chung, *J. Membr. Sci.*, 2014, **458**, 199-208.
- 11 S. P. Dharupaneedi, R. V. Anjanapura, J. M. Han and T.M. Aminabhavi, *Ind. Eng. Chem. Res.*, 2014, **53**, 14474-14484.
- 12 W. Y. Tang, H. Lou, Y. F. Li, X. B. Kong, Y. H. Wu and X.H. Gu, *J. Membr. Sci.*, 2019, **581**, 93-104.
- 13 X. Cheng, W. B. Cai, X. H. Chen, Z. Shi and J.D. Li, *RSC Adv.*, 2019, **9**, 15457-15465.
- 14 K. T. Cao, Z. Y. Jiang, J. Zhao, C. H. Zhao, C. Y. Gao, F. S. Pan, B. Y. Wang, X. Z. Cao and J. Yang, *J. Membr. Sci.*, 2014, **469**, 272-283.
- 15 G.H. Li, L. Shi, G. F. Zeng, M. Li, Y. F. Zhang and Y. H. Sun, *Chem. Commun.*, 2015, **51**, 7345-7348.
- 16 L. L. Xia, C. L. Li and Y. Wang, *J. Membr. Sci.*, 2016, **498**, 263-275.
- 17 E. J. Flynn, D. A. Keane, P. M. Tabari and M.A. Morris, *Sep. Purif. Technol.*, 2013, **118**, 73-80.
- 18 N. X. Wang, S. L. Ji, G. J. Zhang, J. Li and L. Wang, *Chem. Eng. J.*, 2012, **213**, 318-329.

- 19 S. Panahian, A. Raisi and A. Aroujalian, *Desalination.*, 2015, **355**, 45-55.
- 20 J. H. Choi, J. Jegal and W.N. Kim, *Macromol. Symp.*, 2007, **249**, 610-617.
- 21 J. H. Choi, J. Jegal, W. N. Kim and H. S. Choi, *J. Appl. Polym. Sci.*, 2009, **111**, 2186-2193.
- 22 M. L. Gimenes, L. Liu and X. Feng, *J. Membr. Sci.*, 2007, **295**, 71-79.
- 23 S. P. Doguparthy, *J. Membr. Sci.*, 2001, **185**, 201-205.
- 24 Z. Wei, Q. Liu, C. Wu, H. Wang and H. Wang, *Sep. Purif. Technol.*, 2018, **201**, 256-267.
- 25 Q. Liu, H. Wang, C. Wu, Z. Wei and H. Wang, *Sep. Purif. Technol.*, 2017, **188**, 282-292.
- 26 J. Li, L. Zhang, J. Gu, Y. Sun and X. Ji, *RSC Adv.*, 2015, **5**, 19859–19864.
- 27 C. H. Kang, Y. F. Lin, Y. S. Huang, K. L. Tung, K. S. Chung, J. T. Chen, W. S. Hung, K.R. Lee and J.Y. Lai, *J. Membr. Sci.*, 2013, **438**, 105-111.
